# Supplementary material for: Genome Analysis of the G6P6 Genotype of Porcine Group C Rotavirus in China
Source: MDPI journal article supplement (doi:10.3390/ani12212951), 2022-10-27
Supplement: s1 [file s1]

Supplementary Table S2. Reference sequence used in this study.

The RVC VP1 genes used in this study.

| Strain                                     | Host         | Country         | Collection date | Accession No. |
|--------------------------------------------|--------------|-----------------|-----------------|---------------|
| Y/03                                       | Bos taurus   | Japan:Yamagata  | 2003-12-17      | AB874606      |
| Y/2/04                                     | Bos taurus   | Japan:Yamagata  | 2004-01-13      | AB874608      |
| Y/08                                       | Bos taurus   | Japan:Yamagata  | 2008-04-08      | AB874610      |
| RVC/Human-wt/JPN/HI-49/2006/G4P2           | Homo sapiens | Japan           | 2006            | LC129066      |
| RVC/Human-wt/JPN/HO-63/2005/G4P2           | Homo sapiens | Japan           | 2005            | LC129069      |
| RVC/Human-wt/JPN/OS-270/2012/G4P2          | Homo sapiens | Japan           | 2012            | LC129072      |
| RVC/Human-wt/IND/NIV8831/Solapur2010/G4P2  | Homo sapiens | India           | 2010            | MG709364      |
| RVC/Human-wt/IND/NIV22208/Solapur2011/G4P2 | Homo sapiens | India           | 2010            | MG709365      |
| RVC/Human-wt/IND/NIV1418974/Miraj2014/G4P2 | Homo sapiens | India           | 2014            | MG709366      |
| RVC/Dog-wt/HUN/174/2012/G10P8              | dog          | Hungary         | 2012            | KP988013      |
| ROTVPIA                                    |              |                 |                 | M74216        |
| RVC/Pig-wt/Tochigi-2/2014/G6P4             | Sus scrofa   | Japan: Tochigi  | 2014-04-25      | LC122602      |
| RVC/Pig-wt/Ishi-1/2015/G13P4               | Sus scrofa   | Japan: Ishikawa | 2015-10-23      | LC122624      |
| CJ3-6                                      | Sus scrofa   | Japan:Kagoshima | 2002-05         | LC307078      |
| 86-K5                                      | Sus scrofa   | Japan:Chiba     | 2008-07         | LC307090      |
| 87-I4                                      | Sus scrofa   | Japan:Ibaraki   | 2008-09         | LC307091      |
| RVC/Pig-wt/USA/RV0143/2011/G6P5            | Pig          | USA             | Dec-2011        | MN809633      |
| RV0104                                     | Pig          | USA             | 22-Jul-2011     | MN809644      |
| RVC/Pig-wt/BEL/12R021/2012/G3P5_VP1        | Sus scrofa   | Belgium         | 2012            | KP982879      |
| RVC/Pig-wt/CAN/A11-154/2014/G6P5           | pig          | Canada          | 2014            | KY909996      |
| RVC/Pig-wt/USA/NC38/2012/G6P5              | pig          | USA:NC          | 14-Mar-2012     | MG451440      |
| RVC/Pig-wt/ESP/P1C/2017/GXP4               | Sus scrofa   | Spain           | 01-Nov-2017     | MK953072      |
| RVC/Pig-wt/ESP/VC20B/2017/G6P5             | Sus scrofa   | Spain           | 16-Mar-2017     | MK953078      |
| PoRVC_VP1_VIRES_HeB02_C2                   | Sus scrofa   | China           | Apr-2017        | MK379289      |
| RVC/CHN/JS02/2018/G6P6                     | Sus scrofa   | China           | 2018            | ON068577      |

The RVC VP2 genes used in this study.

| Strain                              | Host         | Country         | Collection date | Accession No. |
|-------------------------------------|--------------|-----------------|-----------------|---------------|
| Cowden                              | swine        | USA             | 1980            | FJ970917      |
| RVC/Pig-wt/Tochigi-1-1/2015/G9P4    | Sus scrofa   | Japan: Tochigi  | 2015-11-27      | LC122593      |
| RVC/Pig-wt/Tochigi-2/2014/G6P4      | Sus scrofa   | Japan: Tochigi  | 2014-04-25      | LC122603      |
| RVC/Pig-wt/Tottori-KT01/2015/G13P4  | Sus scrofa   | Japan: Tottori  | 2015-07-15      | LC122614      |
| RVC/Pig-wt/Ishi-1/2015/G13P4        | Sus scrofa   | Japan: Ishikawa | 2015-10-23      | LC122625      |
| CJ3-6                               | Sus scrofa   | Japan:Kagoshima | 2002-05         | LC307099      |
| CJ59-32                             | Sus scrofa   | Japan:Iwate     | 2003-10         | LC307108      |
| 86-H3                               | Sus scrofa   | Japan:Chiba     | 2008-07         | LC307109      |
| 86-H5                               | Sus scrofa   | Japan:Chiba     | 2008-07         | LC307110      |
| 91-G10                              | Sus scrofa   | Japan:Chiba     | 2008-10         | LC307113      |
| 91-G7                               | Sus scrofa   | Japan:Chiba     | 2008-10         | LC307114      |
| 91-H5                               | Sus scrofa   | Japan:Chiba     | 2008-10         | LC307115      |
| 134-9                               | Sus scrofa   | Japan:Miyazaki  | 2010-03         | LC307118      |
| RVC/Pig-wt/USA/OK.5.68/2008         | Sus scrofa   | USA             | 02-Jan-2008     | MH282886      |
| PoRVC_VP2_VIRES_GZ04_C1             | Sus scrofa   | China           | Apr-2017        | MK379221      |
| PoRVC_VP2_VIRES_HeB02_C1            | Sus scrofa   | China           | Apr-2017        | MK379291      |
| PoRVC_VP2_VIRES_NM02_C1             | Sus scrofa   | China           | Apr-2017        | MK379390      |
| PoRVC_VP2_VIRES_NX02_C1             | Sus scrofa   | China           | Apr-2017        | MK379467      |
| RVC/Dog-wt/HUN/174/2012/G10P8       | dog          | Hungary         | 2012            | KP988014      |
| RVC/Human-wt/ITA/PR2593/2004/G4P2   | Homo sapiens | Italy           | 2004            | KT206186      |
| RVC/Human-wt/ITA/PR713/2012/G4P2    | Homo sapiens | Italy           | 2012            | KT206197      |
| RVC/SJZ217/CHN/2015                 | Homo sapiens | China           | Apr-2015        | KY865345      |
| Y/08                                | Bos taurus   | Japan:Yamagata  | 2008-04-08      | AB874616      |
| Shintoku                            | Bos taurus   | Japan           |                 | AB738406      |
| Y/1/04                              | Bos taurus   | Japan:Yamagata  | 2004-01-05      | AB874613      |
| RVC/Pig-wt/BEL/12R021/2012/G3P5_VP2 | Sus scrofa   | Belgium         | 2012            | KP982880      |
| RVC/CHN/JS02/2018/G6P6              | Sus scrofa   | China           | 2018            | ON068578      |

The VP3 genes used in this study.

| Strain                           | Host         | Country          | Collection date | Accession No. |
|----------------------------------|--------------|------------------|-----------------|---------------|
| RVC/Pig-wt/Tochigi-1-1/2015/G9P4 | Sus scrofa   | Japan: Tochigi   | 2015-11-27      | LC122594      |
| RVC/Pig-wt/Ishi-1/2015/G13P4     | Sus scrofa   | Japan: Ishikawa  | 2015-10-23      | LC122626      |
| CJ32-3                           | Sus scrofa   | Japan: Akita     | 2002-10         | LC307181      |
| 86-K5                            | Sus scrofa   | Japan: Chiba     | 2008-07         | LC307186      |
| CJ33-5                           | Sus scrofa   | Japan: Aomori    | 2002-11         | LC307182      |
| CJ59-32                          | Sus scrofa   | Japan: Iwate     | 2003-10         | LC307184      |
| 87-14                            | Sus scrofa   | Japan: Ibaraki   | 2008-09         | LC307187      |
| RVC/Pig-wt/Tochigi-2/2014/G6P4   | Sus scrofa   | Japan: Tochigi   | 2014-04-25      | LC122604      |
| CJ27-1                           | Sus scrofa   | Japan: Aomori    | 2002-09         | LC307179      |
| 86-H3                            | Pig          | Japan: Chiba     | 2008-07         | LC307185      |
| CJ10-1                           | Sus scrofa   | Japan: Kagoshima | 2002-05         | LC307176      |
| Cowden                           | Pig          | USA              | 1991            | M74219        |
| CAU 10-312                       | Homo sapiens | South Korea      | 2010            | HQ896712      |
| BS347                            | Homo sapiens | Bangladesh       | 2005            | HQ185634      |
| V508                             | Homo sapiens | India            | 2001            | HQ185631      |
| Y/08                             | Bos taurus   | Japan: Yamagata  | 2008-04-08      | AB874622      |
| Y/10                             | Bos taurus   | Japan: Yamagata  | 2010-11-04      | AB874623      |
| Toyama                           | Bos taurus   | Japan            | 2010            | AB738414      |
| RVC/Dog-wt/HUN/174/2012/G10P8    | dog          | Hungary          | 2012            | KP988015      |
| RVC/CHN/JS02/2018/G6P6           | Porcine      | China            | 2018            | ON068579      |

The RVC VP4 genes used in this study.

| Strain                             | Host         | Country         | Collection date | Accession No. |
|------------------------------------|--------------|-----------------|-----------------|---------------|
| RVC/Human-wt/HUN/ERN6216/2013/G4P2 | Homo sapiens | Hungary         | 2013            | KP776602      |
| RVC/Human-wt/RUS/Omsk08-386/2008   | Homo sapiens | Russia: Omsk    | Apr-2008        | JN934896      |
| RVC/Human-wt/JPN/HO-61/2005/G4P2   | Homo sapiens | Japan           | 2005            | LC129051      |
| RVC/SJZ217/CHN/2015                | Homo sapiens | China           | Apr-2015        | KY865347      |
| RVC/Pig-wt/CZE/P8/2011             | Pig          | Czech Republic  | Nov-2010        | KM099261      |
| RVC/Pig-wt/CZE/P9/2011             | Pig          | Czech Republic  | Nov-2010        | KM099262      |
| RVC/Pig-wt/CZE/P303/2011           | Pig          | Czech Republic  | Dec-2011        | KM099263      |
| RVC/Pig-wt/KOR/07-74-11/2007/G1Px  | porcine      | South Korea     | 2007            | KJ814470      |
| RVC/Pig-wt/KOR/08-148-2/2008/GxPx  | porcine      | South Korea     | 2008            | KJ814471      |
| RVC/Pig-wt/KOR/2478/2012/GxPx      | porcine      | South Korea     | 2012            | KJ814474      |
| RVC/Pig-wt/KOR/2885/2012/G7Px      | porcine      | South Korea     | 2012            | KJ814475      |
| RVC/Pig-wt/KOR/1027/2012/G7Px      | porcine      | South Korea     | 2012            | KJ814476      |
| RVC/Pig-wt/Tottori-KT01/2015/G13P4 | Sus scrofa   | Japan: Tochigi  | 2015-07-15      | LC122611      |
| RVC/Pig-wt/USA/OK.5.68/2008        | Sus scrofa   | USA             | 02-Jan-2008     | MH282888      |
| RVC/Pig-wt/VNM/12129_51/VP4_c1     | Sus scrofa   | Viet Nam        | 27-Mar-2012     | KX362446      |
| RVC/Pig-wt/VNM/14249_25/VP4        | Sus scrofa   | Viet Nam        | 03-Apr-2012     | KX362484      |
| RVC/Pig-wt/CAN/A10-108/2014/G6P4   | Pig          | Canada          | 2014            | KY910036      |
| RVC/Pig-wt/CAN/A11-152/2014/G6P5   | Pig          | Canada          | 2014            | KY910038      |
| VC/Pig-wt/USA/MN14/2012/G1P7       | Pig          | USA:MN          | 08-Feb-2012     | MG451606      |
| RVC/Pig-wt/USA/NC27/2012/G3P7      | Pig          | USA:NC          | 02-Mar-2012     | MG451616      |
| RVC/Pig-wt/USA/MN31/2012/G9P6      | Pig          | USA:MN          | 06-Mar-2012     | MG451619      |
| RVC/Pig-wt/MEX/SO34/2012/G9P5      | Pig          | Mexico:SO       | 07-Mar-2012     | MG451622      |
| RVC/Pig-wt/USA/IA46/2012/G9P7      | Pig          | USA:IA          | 10-Apr-2012     | MG451630      |
| RVC/Pig-wt/USA/AR53/2012/G3P7      | Pig          | USA:AR          | 19-Apr-2012     | MG451632      |
| RVC/Pig-wt/USA/MN56/2012/G9P1      | Pig          | USA:MN          | 03-May-2012     | MG451635      |
| RVC/Pig-wt/ESP/VC20B/2017/G6P5     | Sus scrofa   | Spain           | 16-Mar-2017     | MK953045      |
| RVC/Pig-wt/VNM/12129_51/VP4_c2     | Sus scrofa   | Viet Nam        | 27-Mar-2012     | KX362447      |
| RVC/Pig-wt/USA/RV0104/2011/G3P18   | pig          | USA             | 22-Jul-2011     | MT181131      |
| CJ49-4                             | Porcine      | Japan:Aomori    | 2003-08         | AB902239      |
| 86-K5                              | Porcine      | Japan:Chiba     | 2008-07         | AB905242      |
| 91-G7 P4                           | Porcine      | Japan:Chiba     | 2008-10         | AB905245      |
| 91-G10                             | Porcine      | Japan:Chiba     | 2008-10         | AB905246      |
| 105-4                              | Porcine      | Japan:Gifu      | 2009-03         | AB905250      |
| CJ16-4                             | Porcine      | Japan:Ehime     | 2002-06         | AB905234      |
| CJ31-6                             | Porcine      | Japan:Kagoshima | 2002-10         | AB905236      |
| PoRVC_VP4_VIRES_GZ04_C2            | Porcine      | China           | Apr-2017        | MK379223      |
| PoRVC_VP4_VIRES_HeB02_C3           | Porcine      | China           | Apr-2017        | MK379295      |
| RVC/Pig-tc/USA/Cowden/1991/G1P1    |              |                 |                 | M74218        |
| RVC/CHN/JS02/2018/G6P6             | Porcine      | China           | 2018            | ON068580      |

The RVC VP6 genes used in this study.

| Strain                             | Host       | Country         | Collection date | Accession No. |
|------------------------------------|------------|-----------------|-----------------|---------------|
| RVC/Pig-wt/KOR/07-74-11/2007/G1PX  | porcine    | South Korea     | 2007            | KJ814480      |
| RVC/Pig-wt/KOR/09-15-7/2009/G6PX   | porcine    | South Korea     | 2009            | KJ814481      |
| RVC/Pig-wt/KOR/09-15-9/2009/G3PX   | porcine    | South Korea     | 2009            | KJ814482      |
| RVC/Pig-wt/KOR/08-128-1/2008/GXPX  | porcine    | South Korea     | 2008            | KJ814483      |
| CA-2                               | Pig        | South Korea     | 2009            | GQ925781      |
| BRA634/05-Po                       | piglet     | Brazil          | May-2005        | JF810445      |
| RVC/Pig-wt/USA/CO76/2012/G6P5      | Pig        | USA:CO          | 10-Apr-2012     | MG451721      |
| RVC/Pig-wt/USA/MO33/2012/G6P5      | Pig        | USA:MO          | 07-Mar-2012     | MG451685      |
| RVC/Pig-wt/USA/IA55/2012/G1P4      | Pig        | USA:IA          | 24-Apr-2012     | MG451703      |
| RVC/Pig-wt/USA/IL22/2012/G6P5      | Pig        | USA:IL          | 28-Feb-2012     | MG451675      |
| BRA499/04-Po                       | Pig        | piglet          | Oct-2004        | JF810444      |
| RVC/Pig-wt/USA/IL75/2012/G6P5      | Pig        | USA:IL          | 02-Apr-2012     | MG451720      |
| RVC/Pig-wt/USA/IA46-3/2012/G3PX    | Pig        | USA:IA          | 10-Apr-2012     | MG451697      |
| RVC/Pig-wt/USA/RV0104/2011         | Pig        | USA             | 22-Jul-2011     | KC164674      |
| RVC/Pig-wt/USA/RV0143/2011         | Pig        | USA             | Dec-2011        | KC164677      |
| CUK-5                              | Pig        | South Korea     | 2010            | HQ833829      |
| CUK-6                              | Pig        | South Korea     | 2010            | HQ323753      |
| 06-92-1                            | Pig        | South Korea     | 2009            | FJ494690      |
| RVC/Pig-wt/KOR/06-52-1/2006/GXPX   | porcine    | South Korea     | 2006            | KJ814477      |
| RVC/Pig-wt/CZE/P51/2009            | pig        | Czech Republic  | Apr-2009        | KF036281      |
| RVC/Pig-wt/CZE/P62/2009            | pig        | Czech Republic  | Apr-2009        | KF036282      |
| CJ31-6                             | Sus scrofa | Japan:Kagoshima | 2002-10         | AB889516      |
| RVC/Pig-wt/Tochigi-2/2014/G6P[4]   | Sus scrofa | Japan: Tochigi  | 2014-04-25      | LC122601      |
| CJ10-1                             | Sus scrofa | Japan:Kagoshima | 2002-05         | AB889512      |
| CJ13-6                             | Sus scrofa | Japan:Kagoshima | 2002-05         | AB889513      |
| RVC/Pig-wt/CZE/P131/2010           | Pig        | Czech Republic  | Sep-2010        | KF036286      |
| RVC/Pig-wt/Tochigi-1-1/2015/G9P[4] | Pig        | Japan: Tochigi  | 2015-11-27      | LC122591      |
| RVC/Pig-wt/USA/NC24/2012/G9P4      | Pig        | USA:NC          | 01-Mar-2012     | MG451677      |
| PoRVC_VP6_VIRES_HeB02_C1           | Sus scrofa | China           | Apr-2017        | MK379296      |
| PoRVC_VP6_VIRES_NM01_C1            | Sus scrofa | China           | Apr-2017        | MK379361      |
| PoRVC_VP6_VIRES_NX01_C1            | Sus scrofa | China           | Apr-2017        | MK379436      |
| RVC/Pig-wt/CZE/P111/2010           | pig        | Czech Republic  | Sep-2010        | KF036285      |
| RVC/Pig-wt/CZE/P9/2011             | pig        | Czech Republic  | Nov-2010        | KM099255      |
| RVC/Pig-wt/CZE/P72/2009            | pig        | Czech Republic  | Apr-2009        | KF036283      |
| RVC/Pig-wt/CZE/P207/2010           | pig        | Czech Republic  | Oct-2010        | KF036288      |
| RVC/Pig-wt/CZE/P21/2013            | pig        | Czech Republic  | Mar-2013        | KM099257      |
| RVC/Pig-wt/CZE/P44/2013            | pig        | Czech Republic  | Mar-2013        | KM099258      |
| Cowden                             | Cow        |                 |                 | M94157        |
| RVC/Pig-wt/KOR/04-105-2/2004/GXPX  | porcine    | South Korea     | 2004            | KJ814478      |
| 06-144-2                           | porcine    | South Korea     |                 | FJ494691      |
| Wu82                               | human      | China           |                 | EF528570      |

|                               |              |                |             |          |
|-------------------------------|--------------|----------------|-------------|----------|
| BS347                         | Homo sapiens | Bangladesh     | 2005        | HQ185636 |
| Y/2/04                        | Bos taurus   | Japan:Yamagata | 2004-01-13  | AB874632 |
| Yamagata                      | Bovine       | Japan          |             | AB108680 |
| RVC/Dog-wt/HUN/174/2012/G10P8 | Dog          | Hungary        | 2012        | KP988017 |
| Ferret Rota C-MSU             | Ferret       | USA            | 09-May-2003 | KF578541 |
| RVC/CHN/JS02/2018/G6P6        | porcine      | China          | 2018        | ON068581 |

---

The RVC VP7 genes used in this study.

| Strain                             | Host         | Country        | Collection date | Accession No. |
|------------------------------------|--------------|----------------|-----------------|---------------|
| RVC/Pig-wt/KOR/06-281-4/2006/G6Px  | Porcine      | South Korea    | 2004            | KJ814496      |
| RVC/Pig-wt/KOR/07-109-12/2007/G6Px | Porcine      | South Korea    | 2004            | KJ814498      |
| RVC/Pig-wt/USA/OK-264/2015         | Pig          | USA            | 2015            | MF522700      |
| RV0143                             | Pig          | USA            | Dec-2011        | MN809638      |
| RVC/Pig-wt/USA/OK-179/2014         | Pig          | USA            | 2014            | MF522615      |
| RVC/pig-wt/USA/IL10-31/2010/G6Px   | Pig          | USA: Illinois  | 02-Mar-2010     | JX273328      |
| RVC/pig-wt/USA/IL10-33/2010/G6Px   | Pig          | USA: Illinois  | 02-Mar-2010     | JX273330      |
| RVC/Pig-wt/USA/OK-213/2014         | Pig          | USA            | 2014            | MF522649      |
| RVC/Pig-wt/USA/IA-136/2013         | Pig          | USA            | 2013            | MF522572      |
| RVC/pig-wt/USA/MN09-19/2009/G6Px   | Pig          | USA: Minnesota | 23-Apr-2009     | JX273316      |
| RVC/pig-wt/USA/MN09-14/2009/G6Px   | Pig          | USA: Minnesota | 23-Apr-2009     | JX273311      |
| RVC/SZ94/CHN/2011                  | Homo sapiens | China          | 2011            | KP342029      |
| RVC/SZ272/CHN/2011                 | Homo sapiens | China          | 2011            | KP342040      |
| RVC/SJZ217/CHN/2015                | Homo sapiens | China          | Apr-2015        | KY865349      |
| RVC/pig-wt/USA/AR09-13/2009/G1Px   | Pig          | USA: Arkansas  | 27-Mar-2009     | JX273310      |
| 118-05-27                          | Pig          | Italy          | 2007            | EF464649      |
| RVC/Pig-wt/USA/MN15-3/2012/G1P1    | Pig          | USA:MN         | 13-Feb-2012     | MG451742      |
| 42/05-21                           | Pig          | Italy          | 2007            | EF464650      |
| RVC/Pig-wt/KOR/11-58-7/2011/GxPx   | Porcine      | South Korea    | 2004            | KJ814507      |
| RVC/Pig-wt/KOR/09-84-5/2009/GxPx   | Porcine      | South Korea    | 2008            | KJ814505      |
| RVC/Pig-wt/USA/OK.5.68/2008        | Sus scrofa   | USA            | 02-Jan-2008     | MH282893      |
| RVC/Pig-wt/Tochigi-1-1/2015/G9P4   | Sus scrofa   | Japan: Tochigi | 2015-11-27      | LC122589      |
| 93-H5                              | Porcine      | Japan:Gifu     | 2008-10         | AB905227      |
| RVC/Pig-wt/CZE/P59/2013            | Pig          | Czech Republic | Mar-2013        | KM099271      |
| RVC/Pig-wt/CZE/P303/2011           | Pig          | Czech Republic | Dec-2011        | KM099268      |
| RVC/pig-wt/USA/MN09-10/2009/G5Px   | Pig          | USA: Minnesota | 18-Mar-2009     | JX273307      |
| CJ33-5                             | Sus scrofa   | Japan:Aomori   | 2002-11         | AB905216      |
| 134/04-18                          | Pig          | Italy          | 2004            | EF464653      |
| RVC/Pig-wt/Tottori-KT01/2015/G13P4 | Sus scrofa   | Japan: Tottori | 2015-07-15      | LC122610      |
| RVC/Pig-wt/CZE/P8/2011             | Pig          | Czech Republic | Nov-2010        | KM099266      |
| RVC/Pig-wt/KOR/2846/2012/G3Px      | Porcine      | South Korea    | 2004            | KJ814494      |
| Toyama                             | Bovine       | Japan          | 2010            | AB738417      |
| Yamagata                           | Bovine       | Japan          | 2010            | AB108681      |
| PoRVC_VP7_VIRES_GZ04_C1            | Sus scrofa   | China          | Apr-2017        | MK379227      |
| PoRVC_VP7_VIRES_HeB02_C1           | Sus scrofa   | China          | Apr-2017        | MK379297      |
| PoRVC_VP7_VIRES_NX01_C             | Sus scrofa   | China          | Apr-2017        | MK379437      |
| RVC/CHN/JS02/2018/G6P6             | Sus scrofa   | China          | 2018            | ON068582      |

The RVC NSP1 genes used in this study.

| Strain                             | Host         | Country         | Collection date | Accession No. |
|------------------------------------|--------------|-----------------|-----------------|---------------|
| PoRVC_NSP1_VIRES_HeB02_C2          | Sus scrofa   | China           | Apr-2017        | MK379284      |
| PoRVC_NSP1_VIRES_NM02_C1           | Sus scrofa   | China           | Apr-2017        | MK379385      |
| PoRVC_NSP1_VIRES_NM02_C2           | Sus scrofa   | China           | Apr-2017        | MK379386      |
| CJ33-5                             | Sus scrofa   | Japan:Aomori    | 2002-11         | LC306977      |
| Cowden                             |              |                 |                 | X60546        |
| 91-H5                              | Sus scrofa   | Japan:Chiba     | 2008-10         | LC306986      |
| 91-G7                              | Sus scrofa   | Japan:Chiba     | 2008-10         | LC306984      |
| 91-G10                             | Sus scrofa   | Japan:Chiba     | 2008-10         | LC306985      |
| CJ16-4                             | Sus scrofa   | Japan:Ehime     | 2002-06         | LC306973      |
| CJ59-32                            | Sus scrofa   | Japan:Iwate     | 2003-10         | LC306979      |
| PoRVC_NSP1_VIRES_NM01_C3           | Sus scrofa   | China           | Apr-2017        | MK379353      |
| RVC/Pig-wt/Tottori-KT01/2015/G13P4 | Sus scrofa   | Japan: Tottori  | 2015-07-15      | LC122616      |
| CJ32-3                             | Sus scrofa   | Japan:Akita     | 2002-10         | LC306976      |
| RVC/Pig-wt/Tochigi-2/2014/G6P4     | Sus scrofa   | Japan: Tochigi  | 2014-04-25      | LC122605      |
| RVC/Pig-wt/Ishi-1/2015/G13P4       | Pig          | Japan: Ishikawa | 2015-10-23      | LC122627      |
| CJ49-4                             | Sus scrofa   | Japan:Aomori    | 2003-08         | LC306978      |
| RVC/Pig-wt/Tochigi-1-1/2015/G9P4   | Pig          | Japan: Tochigi  | 2015-11-27      | LC122595      |
| CJ10-1                             | Sus scrofa   | Japan:Kagoshima | 2002-05         | LC306971      |
| RVC/Dog-wt/HUN/174/2012/G10P8      | dog          | Hungary         | 2012            | KP988019      |
| Y/1/04                             | Bos taurus   | Japan:Yamagata  | 2004-01-05      | AB874643      |
| Y/03                               | Bos taurus   | Japan:Yamagata  | 2003-12-17      | AB874642      |
| Shintoku                           | Bos taurus   | Japan           |                 | AB738402      |
| Toyama                             | Bos taurus   | Japan           |                 | AB738407      |
| BK0830                             | Homo sapiens | Japan           | 2008            | HQ185679      |
| Bristol                            | Homo sapiens | United Kingdom  |                 | AJ132204      |
| V508                               | Homo sapiens | India           |                 | AY770977      |
| CAU 10-312                         | Homo sapiens | South Korea     | 2010            | HQ896716      |
| 134-9                              | Sus scrofa   | Japan:Miyazaki  | 2010-03         | LC306990      |
| CJ27-1                             | Sus scrofa   | Japan:Aomori    | 2002-09         | LC306974      |
| 105-4                              | Sus scrofa   | Japan:Gifu      | 2009-03         | LC306989      |
| 93-Z4                              | Sus scrofa   | Japan:Gifu      | 2008-10         | LC306988      |
| 93-H5                              | Sus scrofa   | Japan:Gifu      | 2008-10         | LC306987      |
| RVC/CHN/JS02/2018/G6P6             | Sus scrofa   | China           | 2008            | ON068572      |



The RVC NSP2 genes used in this study.

| Strain                             | Host         | Country         | Collection date | Accession No. |
|------------------------------------|--------------|-----------------|-----------------|---------------|
| PoRVC_NSP2_VIRES_HeB02_C1          | Sus scrofa   | China           | Apr-2017        | MK379286      |
| RVC/Pig-wt/CZE/P141/2010           | Sus scrofa   | Czech Republic  | 2010            | KP776736      |
| Cowden                             |              |                 |                 | X65939        |
| RVC/Pig-wt/CZE/P21/2013            | pig          | Czech Republic  | Mar-2013        | KP776735      |
| RVC/Pig-wt/Ishi-1/2015/G13P4       | Sus scrofa   | Japan: Ishikawa | 2015-10-23      | LC122628      |
| 93-Z4                              | Sus scrofa   | Japan:Gifu      | 2008-10         | LC307009      |
| CJ49-4                             | Sus scrofa   | Japan:Aomori    | 2003-08         | LC306999      |
| CJ16-4                             | Sus scrofa   | Japan:Ehime     | 2002-06         | LC306994      |
| 93-H5                              | Sus scrofa   | Japan:Gifu      | 2008-10         | LC307010      |
| CJ31-6                             | Sus scrofa   | Japan:Kagoshima | 2002-10         | LC306996      |
| 91-G7                              | Sus scrofa   | Japan:Chiba     | 2008-10         | LC307007      |
| 91-H5                              | Sus scrofa   | Japan:Chiba     | 2008-10         | LC307006      |
| CJ33-5                             | Sus scrofa   | Japan:Aomori    | 2002-11         | LC306998      |
| BS347                              | Homo sapiens | Bangladesh      | 2005            | HQ185639      |
| V508                               | Homo sapiens | India           |                 | AY770979      |
| Bristol                            | Homo sapiens | United Kingdom  |                 | AJ132205      |
| YNR001                             | Homo sapiens | China           | 2007            | HQ185659      |
| Y/1/04                             | Bos taurus   | Japan:Yamagata  | 2004-01-05      | AB874649      |
| Toyama                             | Bos taurus   | Japan           |                 | AB738408      |
| Shintoku                           | Bos taurus   | Japan           |                 | AB738403      |
| Y/3/04                             | Bos taurus   | Japan:Yamagata  | 2004-06-02      | AB874651      |
| RVC/Dog-wt/HUN/174/2012/G10P8      | Dog          | Hungary         | 2012            | KP988020      |
| RVC/Pig-wt/Tottori-KT01/2015/G13P4 | Sus scrofa   | Japan: Tottori  | 2015-07-1       | LC122617      |
| CJ13-6                             | Sus scrofa   | Japan:Kagoshima | 2002-05         | LC306993      |
| CJ10-1                             | Sus scrofa   | Japan:Kagoshima | 2002-05         | LC306992      |
| 87-I4                              | Sus scrofa   | Japan:Ibaraki   | 2008-09         | LC307004      |
| 134-9                              | Sus scrofa   | Japan:Miyazaki  | 2010-03         | LC307012      |
| RVC/CHN/JS02/2018/G6P6             | Sus scrofa   | China           | 2018            | ON068573      |

The RVC NSP3 genes used in this study.

| Strain                             | Host         | Country          | Collection date | Accession No. |
|------------------------------------|--------------|------------------|-----------------|---------------|
| RVC/Pig-wt/Tochigi-1-1/2015/G9P4   | Sus scrofa   | Japan: Tochigi   | 2015-11-27      | LC122597      |
| 87-14                              | Sus scrofa   | Japan:Ibaraki    | 2008-09         | LC307027      |
| CJ32-3                             | Sus scrofa   | Japan: Akita     | 2002-10         | LC307019      |
| 93-Z4                              | Sus scrofa   | Japan: Gifu      | 2008-10         | LC307031      |
| 105-4                              | Sus scrofa   | Japan: Gifu      | 2009-03         | LC307033      |
| CAU13-1-77                         | Homo sapiens | South Korea      | 2013            | KT355392      |
| Bristol                            | Homo sapiens | United Kingdom   | 1999            | AJ132203      |
| RVC/SZ94/CHN/2011                  | Homo sapiens | China            | 2011            | KP342032      |
| Y/1/04                             | Bos taurus   | Japan: Yamagata  | 2004-01-05      | AB874655      |
| Wu82                               | Homo sapiens | China            | 2001            | HQ185649      |
| Y/10                               | Bos taurus   | Japan: Yamagata  | 2010-11-04      | AB874659      |
| RVC/Pig-wt/CAN/A8-158/2014/G6P4    | pig          | Canada           | 2014            | KY909964      |
| Y/08                               | Bos taurus   | Japan: Yamagata  | 2008-04-08      | AB874658      |
| RVC/Pig-wt/Ishi-1/2015/G13P4       | Sus scrofa   | Japan: Ishikawa  | 2015-10-23      | LC122629      |
| VC/Pig-wt/Tochigi-2/2014/G6P4      | Sus scrofa   | Japan: Tochigi   | 2014-04-25      | LC122607      |
| CJ13-6                             | Sus scrofa   | Japan: Kagoshima | 2002-05         | LC307015      |
| RVC/Dog-wt/HUN/174/2012/G10P8      | dog          | Hungary          | 2012            | KP988021      |
| CJ10-1                             | Sus scrofa   | Japan: Kagoshima | 2002-05         | LC307014      |
| 87-G2                              | Sus scrofa   | Japan: Ibaraki   | 2008-09         | LC307026      |
| CJ3-6                              | Sus scrofa   | Japan: Kagoshima | 2002-05         | LC307013      |
| CJ16-4                             | Sus scrofa   | Japan: Ehime     | 2002-06         | LC307016      |
| CJ31-6                             | Sus scrofa   | Japan: Kagoshima | 2002-10         | LC307018      |
| 93-H5                              | Sus scrofa   | Japan: Gifu      | 2008-10         | LC307032      |
| CJ33-5                             | Sus scrofa   | Japan: Aomori    | 2002-11         | LC307020      |
| RVC/Pig-wt/Tottori-KT01/2015/G13P4 | Sus scrofa   | Japan: Tottori   | 2015-07-15      | LC122618      |
| PoRVC_NSP3_VIRES_GZ04_C1           | Sus scrofa   | China            | Apr-2017        | MK379219      |
| 134-9                              | Sus scrofa   | Japan: Miyazaki  | 2010-03         | LC307034      |
| Cowden                             |              |                  |                 | M69115        |
| RVC/CHN/JS02/2018/G6P6             | Sus scrofa   | China            | 2018            | ON068574      |

The RVC NSP4 genes used in this study.

| Strain                             | Host         | Country        | Collection date | Accession No. |
|------------------------------------|--------------|----------------|-----------------|---------------|
| RVC/Pig-wt/IND/Por-993/2015        | porcine      | India          | 2015            | KY783644      |
| 87-14                              | Sus scrofa   | Japan:Ibaraki  | 2008-09         | LC307049      |
| CJ32-3                             | porcine      | Japan:Akita    | 2002-10         | LC307041      |
| RVC/Pig-wt/CZE/P8/2011             | pig          | Czech Republic | Nov-2010        | KM099248      |
| RVC/Pig-wt/CZE/P9/2011             | pig          | Czech Republic | Nov-2010        | KM099249      |
| 91-G10                             | pig          | Japan:Chiba    | 2008-10         | LC307050      |
| RVC/Pig-wt/Tottori-KT01/2015/G13P4 | pig          | Japan: Tottori | 2015-07-15      | LC122619      |
| 105-4                              | Sus scrofa   | Japan:Gifu     | 2009-03         | LC307055      |
| 93-Z4                              | Sus scrofa   | Japan:Gifu     | 2008-10         | LC307054      |
| 93-H5                              | pig          | Japan:Gifu     | 2008-10         | LC307053      |
| CJ59-32                            | pig          | Japan:Iwate    | 2003-10         | LC307044      |
| RVC/Pig-wt/Tochigi-1-1/2015/G9P4   | Sus scrofa   | Japan: Tochigi | 2015-11-27      | LC122598      |
| CAU 10-312                         | Homo sapiens | South Korea    | 2010            | HQ896719      |
| BS347                              | Homo sapiens | Bangladesh     | 2005            | HQ185641      |
| Bristol                            | Homo sapiens |                |                 | X83967        |
| YNR001                             | Homo sapiens | China          | 2007            | HQ185661      |
| Y/1/04                             | Bos taurus   | Japan:Yamagata | 2004-01-05      | AB874661      |
| Toyama                             | Bos taurus   | Japan          |                 | AB738410      |
| Y/10                               | Bos taurus   | Japan:Yamagata | 2010-11-04      | AB874665      |
| Shintoku                           | Bos taurus   | Japan          |                 | AB738404      |
| RVC/Dog-wt/HUN/174/2012/G10P8      | dog          | Hungary        | 2012            | KP988022      |
| RVC/CHN/JS02/2018/G6P6             | Sus scrofa   | China          | 2018            | ON068575      |

The RVC NSP5 genes used in this study.

| Strain                             | Host         | Country         | Collection date | Accession No. |
|------------------------------------|--------------|-----------------|-----------------|---------------|
| RVC/Pig-wt/CZE/P8/2011             | pig          | Czech Republic  | Nov-2010        | KP776737      |
| RVC/Pig-wt/CZE/P9/2011             | pig          | Czech Republic  | Nov-2010        | KP776738      |
| RVC/Pig-wt/CZE/P21/2013            | pig          | Czech Republic  | Mar-2013        | KP776739      |
| RVC/Pig-wt/CZE/P44/2013            | pig          | Czech Republic  | Mar-2013        | KP776740      |
| RVC/Pig-wt/CZE/P59/2013            | pig          | Czech Republic  | Mar-2013        | KP776741      |
| RVC/Pig-wt/CZE/P141/2010           | pig          | Czech Republic  | Sep-2010        | KP776742      |
| RVC/Pig-wt/CZE/P303/2011           | pig          | Czech Republic  | Dec-2011        | KP776743      |
| RVC/Pig-wt/Tochigi-1-1/2015/G9P4   | Sus scrofa   | Japan: Tochigi  | 2015-11-27      | LC122599      |
| RVC/Pig-wt/Tochigi-2/2014/G6P4     | Sus scrofa   | Japan: Tochigi  | 2014-04-25      | LC122609      |
| RVC/Pig-wt/Tottori-KT01/2015/G13P4 | Sus scrofa   | Japan: Tochigi  | 2015-07-15      | LC122620      |
| RVC/Pig-wt/Ishi-1/2015/G13P4       | Sus scrofa   | Japan: Tochigi  | 2015-10-23      | LC122631      |
| Cowden                             | Sus scrofa   | USA             |                 | X65938        |
| CAU 10-312                         | Homo sapiens | South Korea     | 2010            | HQ896720      |
| BS347                              | Homo sapiens | Bangladesh      | 2005            | HQ185642      |
| V508                               | Homo sapiens | India           |                 | AY770978      |
| YNR001                             | Homo sapiens | China           | 2007            | HQ185662      |
| Y/1/04                             | Bos taurus   | Japan: Yamagata | 2004-01-05      | AB874667      |
| Y/08                               | Bos taurus   | Japan: Yamagata | 2008-04-08      | AB874670      |
| Y/3/04                             | Bos taurus   | Japan: Yamagata | 2004-06-02      | AB874669      |
| Toyama                             | Bos taurus   | Japan           |                 | AB738411      |
| RVC/Dog-wt/HUN/174/2012/G10P8      | Dog          | Hungary         | 2012            | KP988023      |
| RVC/CHN/JS02/2018/G6P6             | Sus scrofa   | China           | 2018            | ON068576      |
