# Supplementary material for: Genome Analysis of the G6P6 Genotype of Porcine Group C Rotavirus in China
Source: MDPI journal article supplement (doi:10.3390/ani12212951), 2022-10-27
Supplement: s1 [file s1]

**Table S1.** Primers used in this study.

| Primer     | Sequence(5'-3')        | Product(bp) |
|------------|------------------------|-------------|
| F-RVC-VP1  | TAAAAAAAATGGCGCAGTCC   | 3306        |
| R-RVC-VP1  | AGCCACAATATGCAGTCC     |             |
| F-RVC-VP2  | CAAATCGTCCAAGATGATAAGC | 2713        |
| R-RVC-VP2  | CAGAATTTGAGGTCATC      |             |
| F-RVC-VP3  | AAAAAAGCCCAACACGCAAT   | 2162        |
| R-RVC-VP3  | AGCCACATCATACGGTAGAGG  |             |
| F-RVC-VP4  | GGATCAATGGCGTCCTCACTTT | 2248        |
| R-RVC-VP4  | CATAATAAGTCGATCTCCTCAC |             |
| F-RVC-VP6  | GCATTTAAAATCTCATTACACA | 1352        |
| R-RVC-VP6  | AGCCACATAGTTCACATTTCA  |             |
| F-RVC-VP7  | AGCTGTCTGACAAACTGGT    | 1045        |
| R-RVC-VP7  | AGCCACATGATCTTGTTTAC   |             |
| F-RVC-NSP1 | AAGAGCTAGGCTTGGAGGTGT  | 1256        |
| R-RVC-NSP1 | GCCACATAGAGTTTAGTC     |             |
| F-RVC-NSP2 | ATGGCCGAGCTAGCCTGTTTC  | 973         |
| R-RVC-NSP2 | TTCCTGTTGCTTGTAACCTTC  |             |
| F-RVC-NSP3 | TTGCTGGAAATGGCGACTCA   | 1315        |
| R-RVC-NSP3 | CTGCCATTGACCTTTTACTT   |             |
| F-RVC-NSP4 | AAATCGCTTTGCTCTACG     | 527         |
| R-RVC-NSP4 | GCTAGAAATGGACAGAATGG   |             |
| F-RVC-NSP5 | ACAATGTCCGATTTGGAAT    | 687         |
| R-RVC-NSP5 | TCAATGCCGATTCCAGTCA    |             |
| F-SADS-N   | CAGGTCTTGGTGTTCGCAATCG | 449         |
| R-SADS-N   | ACCGTGCTGAACGAGGTCCT   |             |
| F-TGEV-S   | AAGGAAGGGTAAGTTGCTCA   | 1255        |
| R-TGEV-S   | GGTCCATCAGTTACGCCGAA   |             |
| F-PORV-VP7 | GGCTTTAAAAGAGAGAATTTC  |             |

---

|            |                        |      |
|------------|------------------------|------|
| R-PORV-VP7 | GGTCACATCATACAGTTCTAAC | 1062 |
| F-PDCoV-S  | GCAACGCCTATTATCTCG     |      |
| R-PDCoV-S  | ACATGCCATTGTTTACTG     | 1205 |

---
