# Supplementary figures and images for: Genome Analysis of the G6P6 Genotype of Porcine Group C Rotavirus in China
Source: MDPI journal article supplement (doi:10.3390/ani12212951), 2022-10-27

Figure S1

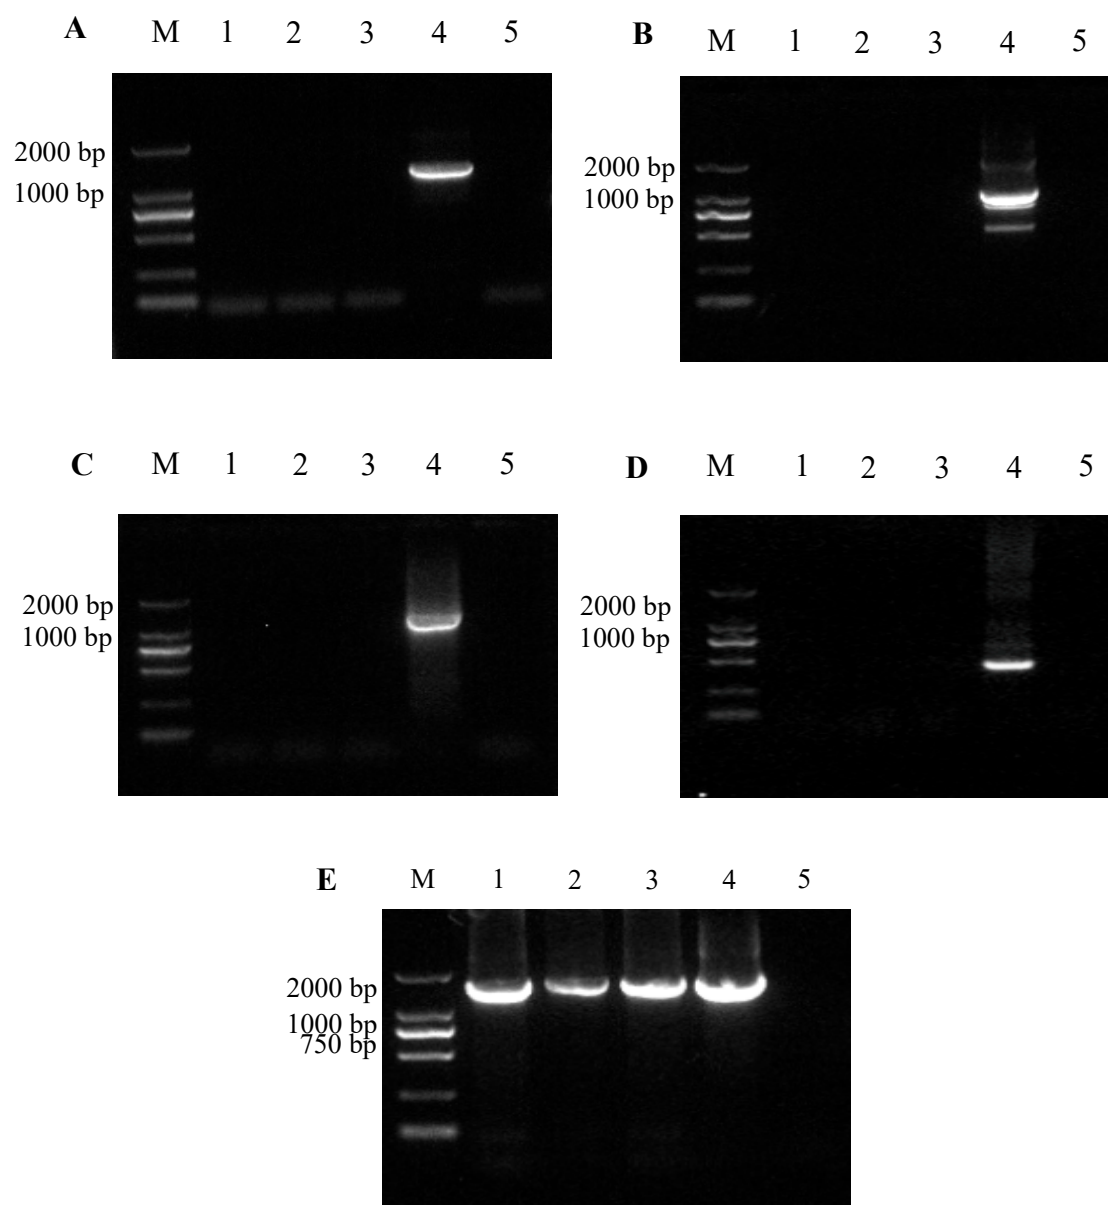

Supplement: s1 [file s1]

Figure S2

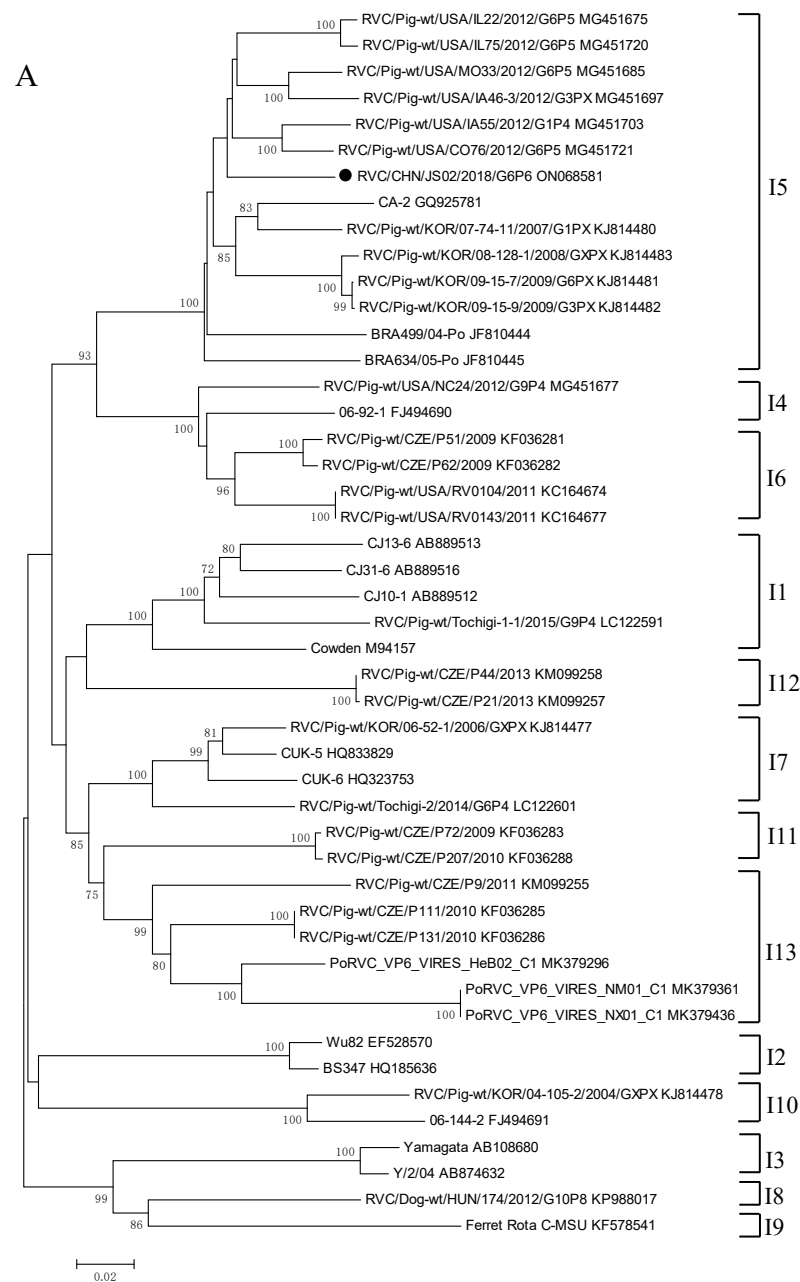

Figure S2 continue

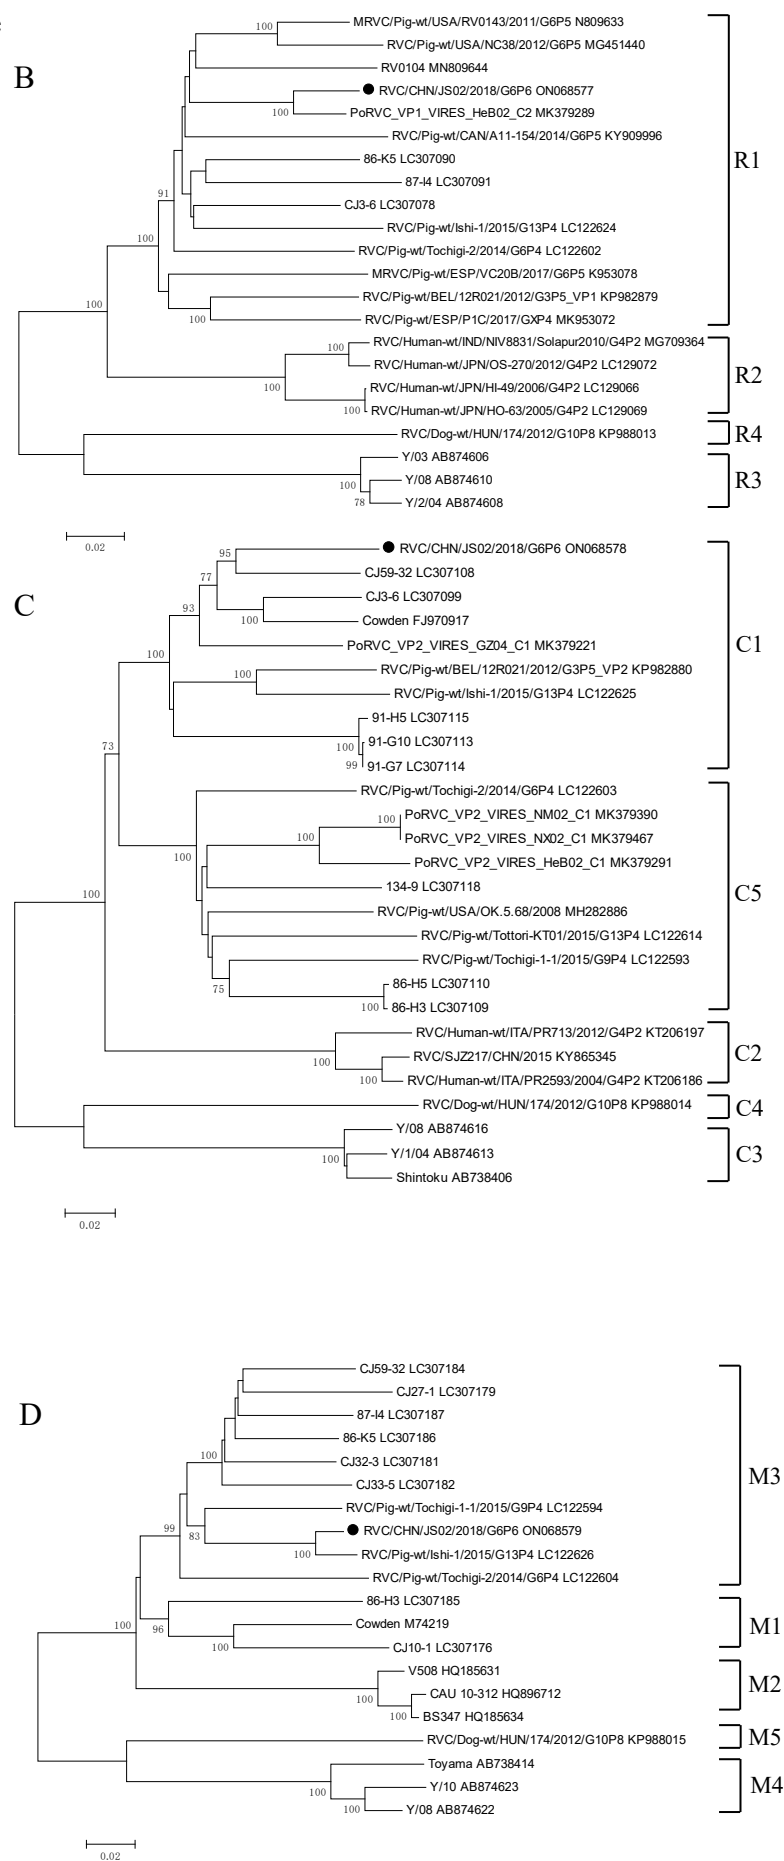

Figure S2 continue

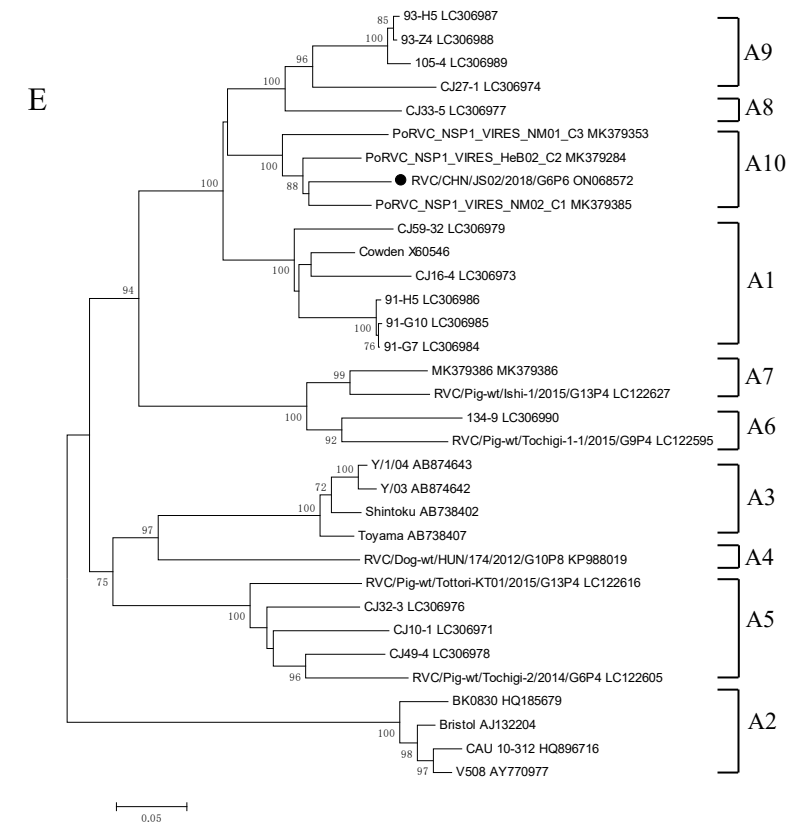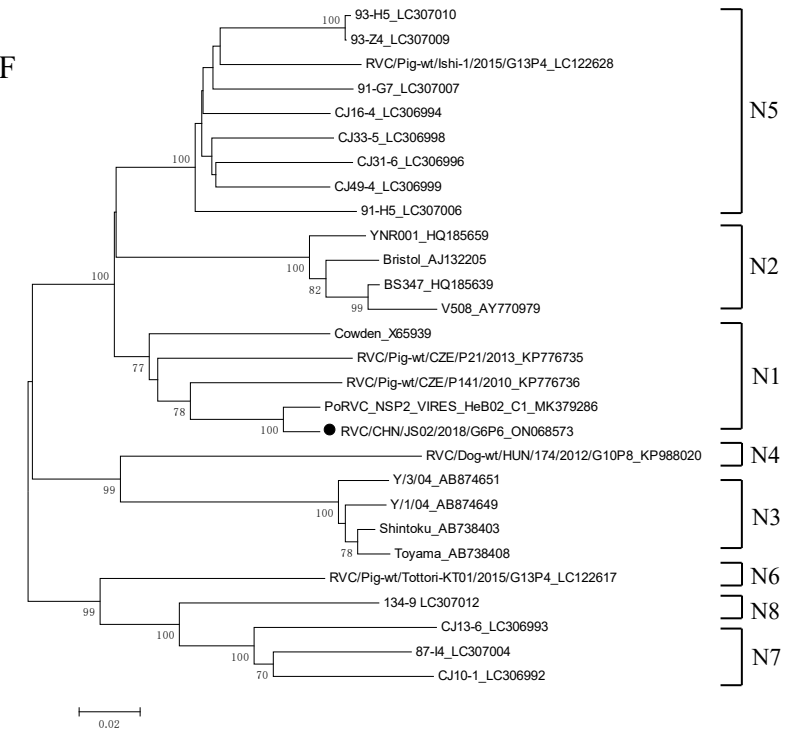

Figure S2 continue

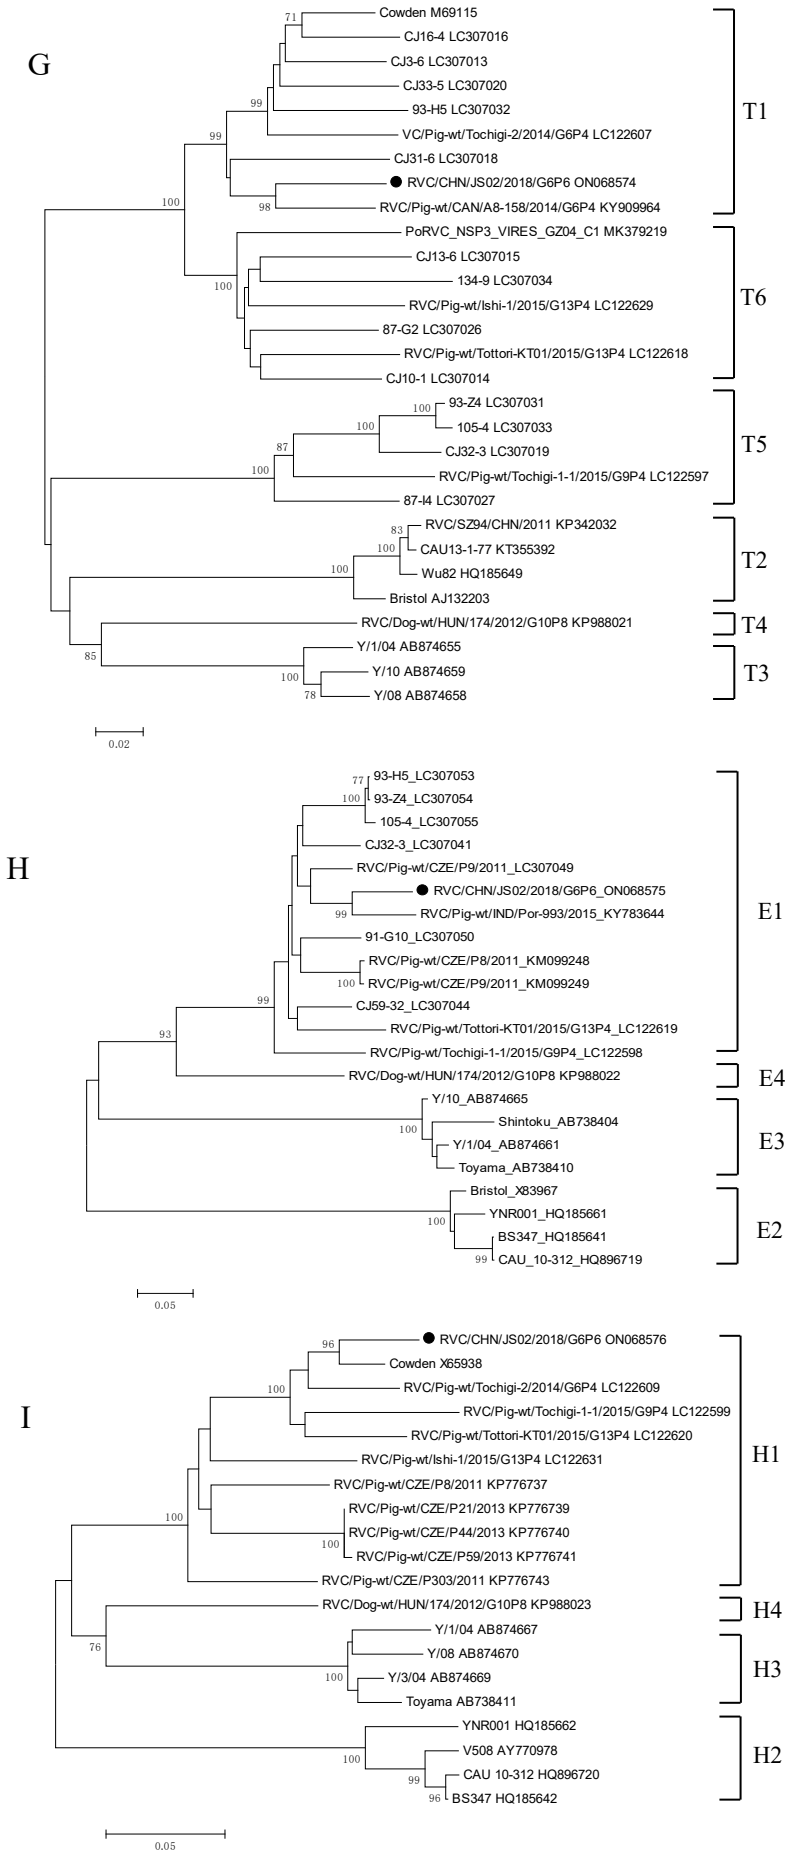

Supplement: s1 [file s1]
